# Supplementary material
Source: publisher figshare collection journal article supplement (https://acs.figshare.com/ndownloader/files/14023871)
Supplement: Supplementary file 1 [file 14023871]

---

## Supporting Information

### Mechanically-Controllable Strong 2D Ferroelectricity and Optical Properties of Semiconducting BiN Monolayer

Peng Chen, Xue-Jing Zhang, and Bang-Gui Liu\*

Beijing National Laboratory for Condensed Matter Physics, Institute of Physics,  
Chinese Academy of Sciences, Beijing 100190, China

School of Physical Sciences, University of Chinese Academy of Sciences, Beijing  
100190, China

\*Email: [bgliu@iphy.ac.cn](mailto:bgliu@iphy.ac.cn)

---

## 1. Total-energy comparison of the BiN monolayer with other similar 2D structures

|                     | BiN       | CuI-like<br>[1] | SiP-like<br>[2] | InSe-like<br>[3] | GeTe-like<br>[4] | GaSe-like<br>[5] | BN-like<br>[6] |
|---------------------|-----------|-----------------|-----------------|------------------|------------------|------------------|----------------|
| Energy<br>(eV/f.u.) | -11.78267 | -11.56397       | -11.44983       | -11.05758        | -11.04598        | -11.02103        | -10.44433      |

[1] Synthesis of ultrathin two-dimensional nanosheets and van der Waals heterostructures from non-layered  $\gamma$ -CuI, npj 2D Materials and Applications **2**, 16 (2018)

[2] Two-dimensional SiP: an unexplored direct bandgap semiconductor, 2D Mater. **4**, 015030 (2017)

[3] InSe: a two-dimensional material with strong interlayer coupling, Nanoscale **10**, 7991 (2018)

[4] Sonication-assisted liquid-phase exfoliated  $\alpha$ -GeTe: a two-dimensional material with high Fe<sup>3+</sup> sensitivity, Nanoscale **10**, 15989 (2018)

[5] Multifunctional 2D- Materials: Gallium Selenide, Materials Today: Proceedings **4**, 5471 (2017)

[6] B/C/N Materials Based on the Graphite Network, Adv Mater **8**, 9 (1997)

## 2. Structural parameters under uniaxial stress.

| Strain           | -5.0%                                                                 | -2.0%                                                                | 0.0%                                                                  | 2.0%                                                                  | -2.0%                                                                 | 0.0%                                                                  | 2.0%                                                                  | 5.0%                                                                  |
|------------------|-----------------------------------------------------------------------|----------------------------------------------------------------------|-----------------------------------------------------------------------|-----------------------------------------------------------------------|-----------------------------------------------------------------------|-----------------------------------------------------------------------|-----------------------------------------------------------------------|-----------------------------------------------------------------------|
| Lattice constant | a=3.2960<br>b=3.6767<br>c=15.000<br>$\gamma = 90$                     | a=3.4000<br>b=3.6478<br>c=15.000<br>$\gamma = 90$                    | a=3.4694<br>b=3.6287<br>c=15.000<br>$\gamma = 90$                     | a=3.5388<br>b=3.6070<br>c=15.000<br>$\gamma = 90$                     | a=3.5380<br>b=3.4749<br>c=15.000<br>$\gamma = 90$                     | a=3.6287<br>b=3.4694<br>c=15.000<br>$\gamma = 90$                     | a=3.7194<br>b=3.4619<br>c=15.000<br>$\gamma = 90$                     | a=3.8101<br>b=3.4556<br>c=15.000<br>$\gamma = 90$                     |
| Wyckoff position | Bi:<br>0.0000<br>0.5527<br>0.4617<br>N:<br>0.0000<br>0.4473<br>0.6055 | Bi<br>0.0000<br>0.5551<br>0.4626<br>N:<br>0.0000<br>0.4449<br>0.6059 | Bi:<br>0.0000<br>0.5567<br>0.4631<br>N:<br>0.0000<br>0.4433<br>0.6062 | Bi:<br>0.0000<br>0.5578<br>0.4637<br>N:<br>0.0000<br>0.4422<br>0.6064 | Bi:<br>0.0489<br>0.5000<br>0.6376<br>N:<br>0.9511<br>0.5000<br>0.4938 | Bi:<br>0.0567<br>0.5000<br>0.6369<br>N:<br>0.9433<br>0.5000<br>0.4938 | Bi:<br>0.0630<br>0.5000<br>0.6361<br>N:<br>0.9370<br>0.5000<br>0.4938 | Bi:<br>0.0689<br>0.5000<br>0.6354<br>N:<br>0.9311<br>0.5000<br>0.4939 |

Eight structures are given in the table. All of them are from the lowest energy phases from fig3 (a). More precisely, the first 4 structures belong to the ferroelectric [010] phase under strain, and the remaining 4 structures belong to the ferroelectric [100] phase. The 3<sup>rd</sup> and 6<sup>th</sup> columns describe the minima of the [010] and [100] phases, respectively. The 4<sup>th</sup> and 5<sup>th</sup> columns describe the two phases the crossing at the transition point in fig3 (a).

### 3. Effect of the spin-orbits coupling on the band structures

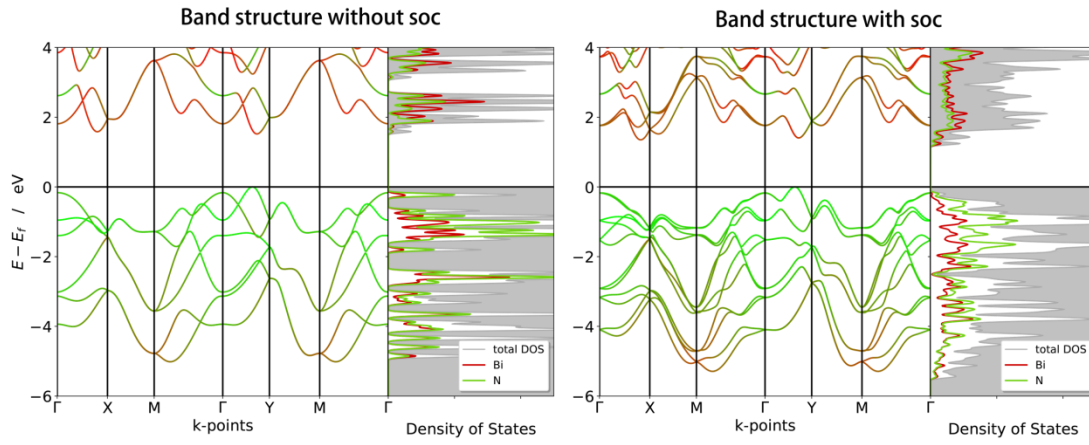

The band structures and density of states (DOS) of the BiN monolayer without and with (the left and the right) the spin-orbit coupling (soc).
